# Supplementary material
Source: ML conference proceedings conference paper supplement (https://www.ecva.net/papers/eccv_2020/papers_ECCV/html/123700579_ECCV_2020_paper.php)
Supplement: Supplementary file 3 [file 123700579-supp.zip]

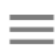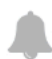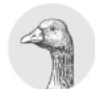

Leaderboard Rules Team My Submissions

Public Leaderboard

Private Leaderbo...

This leaderboard is calculated with approximately 30% of the test data.

The final results will be based on the other 70%, so the final standings may be different.

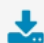

Raw Data

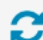

Refresh

| # | Team Name | Score ? |
|---|-----------|---------|
| 1 | Wenjing   | 0.220   |
| 2 | KL        | 0.205   |
| 3 | yukke42   | 0.183   |
| 4 | OIDH      | 0.183   |

### Your Best Entry ↑

Your submission scored 0.148, which is not an improvement of your best score. Keep trying!

|   |                           |       |
|---|---------------------------|-------|
| 5 | Marek Wyborski            | 0.167 |
| 6 | Hanxiao Deng @ XMotors.ai | 0.159 |
| 7 | Robin Lagir               | 0.149 |
| 8 | rishigami                 | 0.147 |
| 9 | logachev                  | 0.145 |
